# Supplementary material for: The use of deep learning in medical imaging to improve spine care: A scoping review of current literature and clinical applications
Source: PubMed Central journal article supplement — N Am Spine Soc J. 2023 Jun 19;15:100236. doi: 10.1016/j.xnsj.2023.100236 (PMC10432249; doi:10.1016/j.xnsj.2023.100236), 2023-06-19
Supplement: mmc2.pdf [file mmc2.pdf]

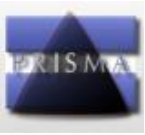

## Spine - PRISMA 2009 Flow Diagram

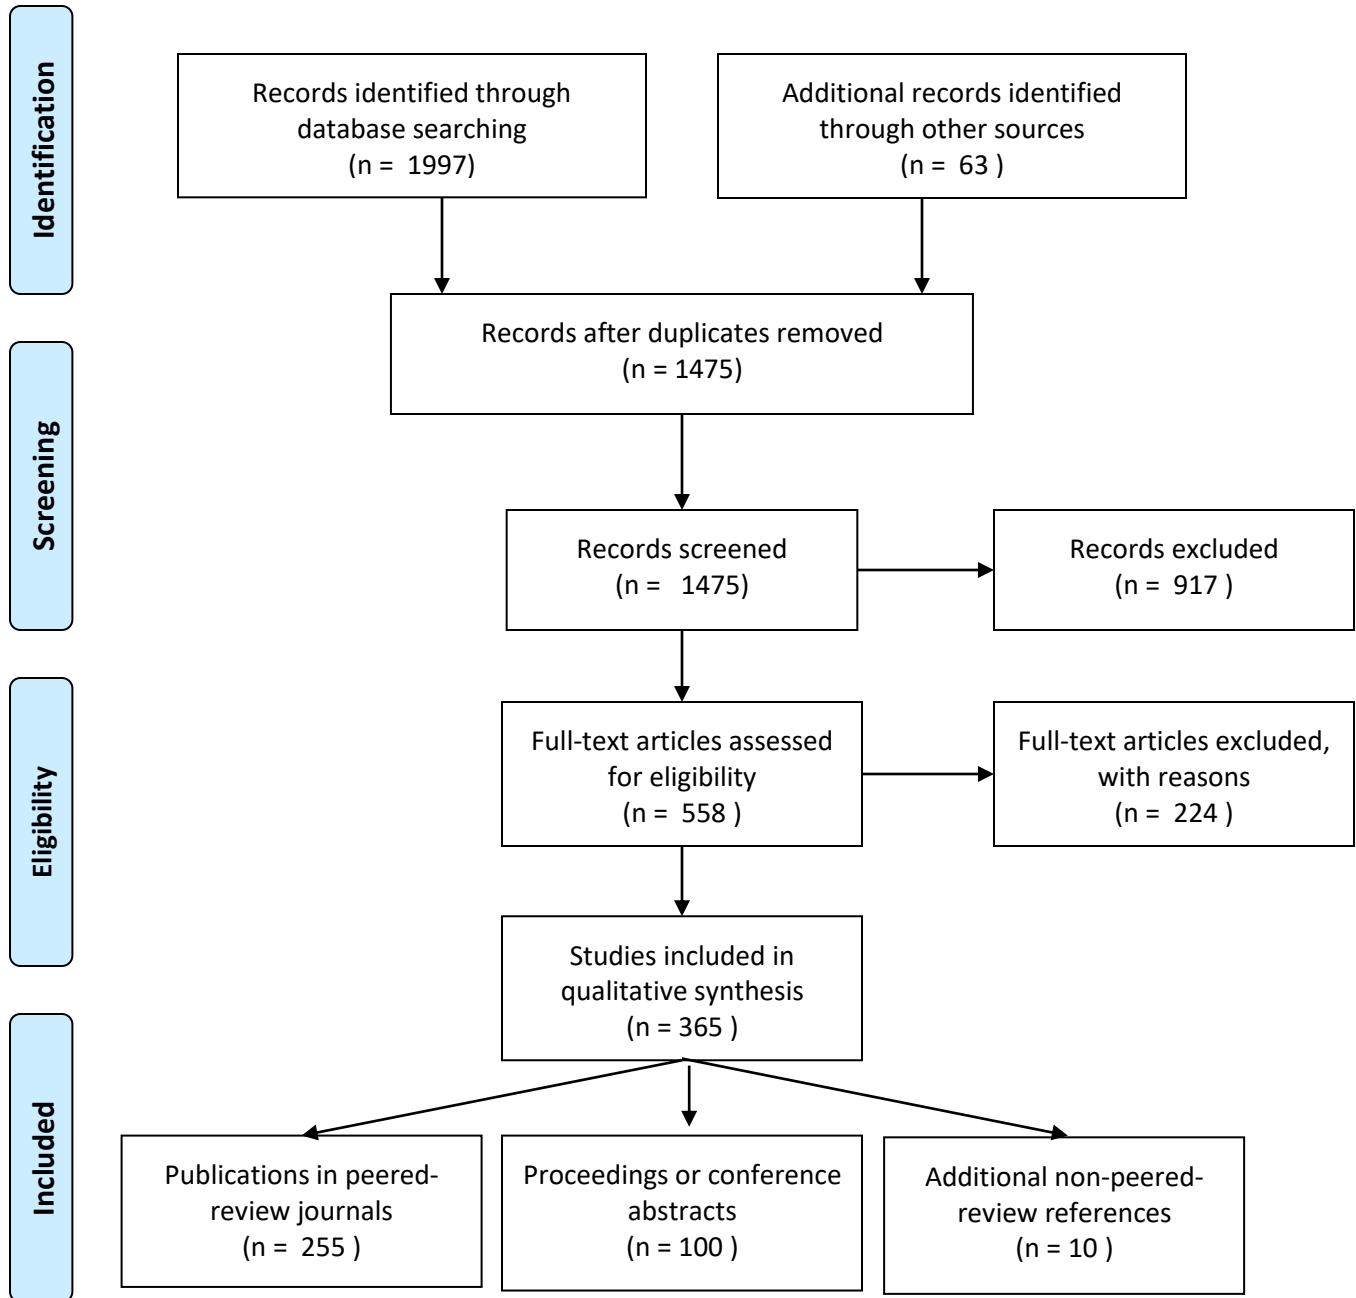

From: Moher D, Liberati A, Tetzlaff J, Altman DG, The PRISMA Group (2009). Preferred Reporting Items for Systematic Reviews and Meta-Analyses: The PRISMA Statement. PLoS Med 6(6): e1000097. doi:10.1371/journal.pmed1000097

For more information, visit [www.prisma-statement.org](http://www.prisma-statement.org).
